# Supplementary material for: The Effect of Atmospheric Cold Plasma on Bacterial Stress Responses and Virulence Using Listeria monocytogenes Knockout Mutants
Source: Front Microbiol. 2019 Dec 11;10:2841. doi: 10.3389/fmicb.2019.02841 (PMC6918802; doi:10.3389/fmicb.2019.02841)
Supplement: Supplementary file 2 [file Table_2.xlsx]

## Sheet: Set1_1
Block Type	96fast
Chemistry	SYBR_GREEN
Experiment File Name	D:\Users\INSTR-USER\Documents\Mutant set 1_2.eds
Experiment Run End Time	2018-05-11 16:52:21 PM BST
Instrument Type	sds7500fast
Table S2: Transcription analysis was performed for Listeria monocytogenes EGD-e wild type strain. Relative expression of stress associated genes (prfA, sigB, rsbR, gadD, lmo0799) following exposure to ACP treatment was quantified using real-time reverse transcription-PCR (RT-PCR).
Well	Sample Name	Target Name	Reporter	Cт	Cт Mean	Cт SD	ΔCт Mean	ΔΔCт	RQ	log 2 RQ
A1	untreated	16s	SYBR	11.0037	10.9517	0.0735857
A2	untreated	rsbR	SYBR	13.6898	13.6997	0.0139244	2.74798		1
A3	untreated	prfA	SYBR	18.571	19.1845	0.867611	8.2328		1
A4	untreated	D1	SYBR	17.9132	18.0606	0.20845	7.10891		1
A5	untreated	D2	SYBR	16.7579	16.6711	0.12271	5.7194		1
A6	untreated	lmo0799	SYBR	18.9664	18.8967	0.0985926	7.94502		1
B1	untreated	16s	SYBR	10.8997	10.9517	0.0735857
B2	untreated	rsbR	SYBR	13.7095	13.6997	0.0139244	2.74798		1
B3	untreated	prfA	SYBR	19.798	19.1845	0.867611	8.2328		1
B4	untreated	D1	SYBR	16.8623	16.3805	0.681366	4.86438		1
B5	untreated	D2	SYBR	16.5843	16.6711	0.12271	5.7194		1
B6	untreated	lmo0799	SYBR	18.827	18.8967	0.0985926	7.94502		1
C3	1min	16s	SYBR	11.9465	11.8469	0.140849
C4	1min	rsbR	SYBR	12.3495	12.5827	0.329688	0.735735	-2.01225	4.0341	2.01225
C5	1min	prfA	SYBR	18.1877	17.7192	0.66265	5.87225	-2.36056	5.13568	2.36056
C6	1min	D1	SYBR	14.8131	15.0823	0.380743	3.23541	-3.8735	14.6568	3.8735
C7	1min	D2	SYBR	11.0914	10.922	0.23964	-0.924973	-6.64437	100.036	6.64437
C8	1min	lmo0799	SYBR	12.5354	12.5569	0.0303242	0.709933	-7.23509	150.653	7.23509
D3	1min	16s	SYBR	11.7473	11.8469	0.140849
D4	1min	rsbR	SYBR	12.8158	16.5827	3.15812	1.73573	-2.01225	4.0341	2.01225
D5	1min	prfA	SYBR	17.2506	20.7192	0.66265	5.87225	-2.36056	5.13568	2.36056
D6	1min	D1	SYBR	15.3516	31.0823	3.8619	16.2354	-3.8735	14.6568	3.8735
D7	1min	D2	SYBR	10.7525	10.922	0.23964	-0.924973	-6.64437	100.036	6.64437
D8	1min	lmo0799	SYBR	12.5783	12.5569	0.0303242	0.709933	-7.23509	150.653	7.23509
E3	3min	16s	SYBR	13.5237	13.5251	0.00208237
E4	3min	rsbR	SYBR	14.0854	14.4117	0.461461	0.886547	-1.86144	3.63369	1.86144
E5	3min	prfA	SYBR	24.1438	24.0505	0.131961	10.5253	2.29253	0.204118	-2.29253
E6	3min	D1	SYBR	20.0788	19.5719	0.716858	6.04675	-1.06216	2.08806	1.06216
E7	3min	D2	SYBR	16.1482	16.0616	0.122437	2.53647	-3.18292	9.08144	3.18292
E8	3min	lmo0799	SYBR	15.7181	15.7532	0.0496909	2.22811	-5.71691	52.5972	5.71691
F1	3min	16s	SYBR	13.5266	13.5251	0.00208237
F2	3min	rsbR	SYBR	14.738	14.4117	0.461461	0.886547	-1.86144	3.63369	1.86144
F3	3min	prfA	SYBR	23.9572	24.0505	0.131961	10.5253	2.29253	0.204118	-2.29253
F4	3min	D1	SYBR	19.065	19.5719	0.716858	6.04675	-1.06216	2.08806	1.06216
F5	3min	D2	SYBR	15.975	16.0616	0.122437	2.53647	-3.18292	9.08144	3.18292
F6	3min	lmo0799	SYBR	15.7884	15.7532	0.0496909	2.22811	-5.71691	52.5972	5.71691
Analysis Type	Singleplex
Endogenous Control	16s
RQ Min/Max Confidence Level	95.0
Reference Sample	untreated

## Sheet: Set1_2
Block Type	96fast
Chemistry	SYBR_GREEN
Experiment File Name	D:\Users\INSTR-USER\Documents\Mutant set 1_2.eds
Experiment Run End Time	2018-05-17 18:58:34 PM BST
Instrument Type	sds7500fast
Passive Reference	ROX
Well	Sample Name	Target Name	Reporter	Cт	Cт Mean	Cт SD	ΔCт Mean	ΔΔCт	RQ	log 2 RQ
A1	untreated	16s	SYBR	11.1383	11.5161	0.534255
A2	untreated	rsbR	SYBR	14.1194	14.0919	0.0389173	2.57575		1
A3	untreated	prfA	SYBR	20.1946	20.9952	1.13221	9.47913		1
A4	untreated	D1	SYBR	15.8987	16.3805	0.681366	4.86438		1
A5	untreated	D2	SYBR	17.5848	17.3592	0.319064	5.84313		1
A6	untreated	lmo0799	SYBR	20.0954	20.7263	0.892284	9.21022		1
B1	untreated	16s	SYBR	11.8939	11.5161	0.534255
B2	untreated	rsbR	SYBR	14.0643	14.0919	0.0389173	2.57575		1
B3	untreated	prfA	SYBR	21.7958	20.9952	1.13221	9.47913		1
B4	untreated	D1	SYBR	16.8623	16.3805	0.681366	4.86438		1
B5	untreated	D2	SYBR	17.1336	17.3592	0.319064	5.84313		1
B6	untreated	lmo0799	SYBR	21.3573	20.7263	0.892284	9.21022		1
C3	1min	16s	SYBR	12.5538	12.0655	0.690645
C4	1min	rsbR	SYBR	10.9542	11.4466	0.696333	-0.618852	-3.1946	9.15526	3.1946
C5	1min	prfA	SYBR	19.0977	18.8319	0.375911	6.76646	-2.71266	6.55531	2.71266
C6	1min	D1	SYBR	13.4053	13.1628	0.342966	1.09732	-3.76706	13.6144	3.76706
C7	1min	D2	SYBR	10.0986	10.3469	0.351171	-1.7186	-7.56173	188.933	7.56173
C8	1min	lmo0799	SYBR	11.5345	11.0912	0.626882	-0.974249	-10.1845	1163.67	10.1845
D3	1min	16s	SYBR	11.5771	12.0655	0.690645
D4	1min	rsbR	SYBR	11.939	11.4466	0.696333	-0.618852	-3.1946	9.15526	3.1946
D5	1min	prfA	SYBR	18.5661	20.8469	0.481977	8.78146	-2.71004	6.54341	2.71004
D6	1min	D1	SYBR	12.9203	13.1628	0.342966	1.09732	-3.76444	13.5897	3.76444
D7	1min	D2	SYBR	10.5952	10.9804	0.0921846	-2.5433	-7.5458	186.859	7.5458
D8	1min	lmo0799	SYBR	10.6479	10.5912	0.0802247	-1.47425	-10.1968	1173.7	10.1968
E3	3min	16s	SYBR	13.7209	14.2103	0.6922
E4	3min	rsbR	SYBR	16.1952	16.3435	0.209738	2.13321	-0.442538	1.35899	0.442538
E5	3min	prfA	SYBR	24.4278	24.8561	0.605707	10.6457	1.16661	0.445467	-1.16661
E6	3min	D1	SYBR	18.04	17.714	0.460968	3.5037	-1.36068	2.56806	1.36068
E7	3min	D2	SYBR	16.9382	17.4416	0.711949	3.2313	-2.61183	6.11278	2.61183
E8	3min	lmo0799	SYBR	19.9455	19.5678	0.534206	5.35744	-3.85278	14.4478	3.85278
F1	3min	16s	SYBR	14.6998	14.2103	0.6922
F2	3min	rsbR	SYBR	16.4918	17.392	0.990222	2.18171	-0.406418	1.32539	0.406418
F3	3min	prfA	SYBR	25.2844	24.8561	0.605707	10.6457	1.16661	0.445467	-1.16661
F4	3min	D1	SYBR	17.3881	17.714	0.460968	3.5037	-1.35806	2.5634	1.35806
F5	3min	D2	SYBR	17.945	17.4416	0.711949	3.2313	-2.62121	6.15265	2.62121
F6	3min	lmo0799	SYBR	19.19	19.0678	0.1729	4.85744	-3.86516	14.5723	3.86516
Analysis Type	Singleplex
Endogenous Control	16s
RQ Min/Max Confidence Level	95.0

## Sheet: Set2_1
Block Type	96fast
Chemistry	SYBR_GREEN
Experiment File Name	D:\Users\INSTR-USER\Documents\Mutant set 2_1.eds
Experiment Run End Time	2018-05-15 21:38:30 PM BST
Instrument Type	sds7500fast
Well	Sample Name	Target Name	Reporter	Cт	Cт Mean	Cт SD	ΔCт Mean	ΔΔCт	RQ	log 2 RQ
A1	untreated	16s	SYBR	13.6223	14.169	0.773201
A2	untreated	sigB	SYBR	23.8014	23.9503	0.210637	9.78131		1
A3	untreated	D3	SYBR	15.387	15.744	0.504874	1.57494		1
B1	untreated	16s	SYBR	14.7158	14.169	0.773201
B2	untreated	sigB	SYBR	24.0993	23.9503	0.210637	9.78131		1
B3	untreated	D3	SYBR	16.101	15.744	0.504874	1.57494		1
C1	1min	16s	SYBR	15.8251	15.3685	0.645705
C2	1min	sigB	SYBR	11.8128	11.3688	0.627826	-3.9997	-13.781	14076.6	13.781
C3	1min	D3	SYBR	14.0829	13.6657	0.590083	-1.70283	-3.27777	9.69858	3.27777
D1	1min	16s	SYBR	14.9119	15.3685	0.645705
D2	1min	sigB	SYBR	10.9249	11.3688	0.627826	-3.9997	-13.781	14076.6	13.781
D3	1min	D3	SYBR	13.2484	13.6657	0.590083	-1.70283	-3.27777	9.69858	3.27777
E1	3min	16s	SYBR	15.0412	14.6223	0.592401
E2	3min	sigB	SYBR	11.202	10.9361	0.376047	-3.68621	-3.68621	12.8724	3.68621
E3	3min	D3	SYBR	18.4473	17.8246	0.880702	3.20229	1.62735	0.323682	-1.62735
F1	3min	16s	SYBR	14.2034	14.6223	0.592401
F2	3min	sigB	SYBR	10.6702	10.9361	0.376047	-3.68621	-3.68621	12.8724	3.68621
F3	3min	D3	SYBR	17.2018	17.8246	0.880702	3.20229	1.62735	0.323682	-1.62735
Analysis Type	Singleplex
Endogenous Control	16s
RQ Min/Max Confidence Level	95.0
Reference Sample	untreated

## Sheet: Set2_2
Block Type	96fast
Chemistry	SYBR_GREEN
Experiment File Name	D:\Users\INSTR-USER\Documents\Mutant set 2_1.eds
Experiment Run End Time	2018-05-19 16:56:44 PM BST
Instrument Type	sds7500fast
Well	Sample Name	Target Name	Reporter	Cт	Cт Mean	Cт SD	ΔCт Mean	ΔΔCт	RQ	log 2 RQ
A1	untreated	16s	SYBR	11.046	12.0119	1.36609
A2	untreated	sigB	SYBR	24.9332	25.0645	0.185621	13.0525		1
A3	untreated	D3	SYBR	14.0263	14.7036	0.957826	2.6917		1
B1	untreated	16s	SYBR	12.9779	12.0119	1.36609
B2	untreated	sigB	SYBR	25.1957	22.4952	0.425101	11.4915		1
B3	untreated	D3	SYBR	15.3809	14.7036	0.957826	2.6917		1
C1	1min	16s	SYBR	13.8538	13.7155	0.19567
C2	1min	sigB	SYBR	9.54406	9.77284	0.323552	-3.94262	-16.9951	130632	16.9951
C3	1min	D3	SYBR	12.5937	12.7421	0.209747	-0.973406	-3.66511	12.6855	3.66511
D1	1min	16s	SYBR	13.5771	13.7155	0.19567
D2	1min	sigB	SYBR	10.0016	9.77284	0.323552	-3.94262	-16.9951	130632	16.9951
D3	1min	D3	SYBR	12.8904	12.7421	0.209747	-0.973406	-3.66511	12.6855	3.66511
E1	3min	16s	SYBR	12.5538	13.1625	0.860736
E2	3min	sigB	SYBR	10.9872	10.5343	0.640382	-2.62812	-2.62812	6.18222	2.62812
E3	3min	D3	SYBR	15.724	14.9126	1.14755	1.75012	-0.941584	1.92064	0.941584
F1	3min	16s	SYBR	13.7711	13.1625	0.860736
F2	3min	sigB	SYBR	10.0815	10.5343	0.640382	-2.62812	-2.62812	6.18222	2.62812
F3	3min	D3	SYBR	14.1011	14.9126	1.14755	1.75012	-0.941584	1.92064	0.941584
Analysis Type	Singleplex
Endogenous Control	16s
RQ Min/Max Confidence Level	95.0
Reference Sample	untreated

## Sheet: Results
	log 2 RQ	1		2		1 min	3 min	1 min	3 min
	Genes	1 min	3 min	1 min	3 min	Average	Average	SD	SD
	rsbR	2.01225	1.86144	3.1946	0.406418	2.60342	1.13393	0.836049	1.02885
	prfA	2.36056	-2.29253	2.71004	-1.16661	2.5353	-1.72957	0.247126	0.796145
	sigB	13.781	3.68621	16.9951	2.62812	15.3881	3.15717	2.27274	0.748183
	D1	3.8735	1.06216	3.76444	1.35806	3.81897	1.21011	0.0771215	0.209227
	D2	6.64437	3.18292	7.5458	2.62121	7.09509	2.90206	0.637411	0.397191
	D3	3.27777	-1.62735	3.66511	0.941584	3.47144	-0.342884	0.273886	1.81651
	lmo0799	7.23509	5.71691	10.1968	3.86516	8.71597	4.79104	2.09428	1.30939
